# Supplementary material
Source: HighWire-hosted journal article supplement (https://jnm.snmjournals.org/highwire/filestream/94555/field_highwire_adjunct_files/0/136127_Supplemental_Data.pdf)

## Details of the cohort

| Patient ID | Age | Sex    | Histology      | TNM Stage | Chemotherapy regimen |
|------------|-----|--------|----------------|-----------|----------------------|
| 1          | 69  | Female | Large Cell     | T3N0M0    | C/E                  |
| 2          | 75  | Male   | Large Cell     | T2N2M0    | C/E                  |
| 3          | 77  | Male   | SCC            | T2N2M0    | C/P                  |
| 4          | 75  | Female | Large Cell     | T1N1M0    | C/P                  |
| 5          | 62  | Male   | SCC            | T1N2M0    | C/E                  |
| 6          | 57  | Female | AdenoCA        | T1N0M0    | C/P                  |
| 7          | 84  | Male   | SCC            | T2N0M0    | C/P                  |
| 8          | 67  | Male   | SCC            | T1N0M0    | C/P                  |
| 9          | 64  | Female | SCC            | T4N3M0    | C/E                  |
| 11         | 60  | Male   | Large Cell     | T2N1M0    | C/P                  |
| 12         | 47  | Female | AdenoCA        | T1N3M0    | C/E                  |
| 13         | 65  | Male   | Large Cell     | T3N3M0    | C/E                  |
| 14         | 73  | Male   | AdenoCA        | T2N3M0    | C/E                  |
| 15         | 52  | Female | AdenoCA        | T2N2M0    | C/P                  |
| 16         | 56  | Male   | AdenoCA        | T2N3M0    | C/P                  |
| 17         | 81  | Male   | SCC            | T3N1M0    | C/P                  |
| 18         | 63  | Female | NS             | T2N2M0    | C/E                  |
| 19         | 57  | Female | SCC            | T2N2M0    | C/P                  |
| 21         | 74  | Male   | SCC            | T4N0M0    | C/P                  |
| 22         | 64  | Female | AdenoCA        | T1N2M0    | C/E                  |
| 23         | 53  | Female | AdenoCA        | T4N3M0    | C/E                  |
| 24         | 63  | Female | AdenoCA        | T4N3M0    | C/E                  |
| 25         | 78  | Female | SCC            | T2N2M0    | C/P                  |
| 26         | 67  | Male   | SCC            | T1N2M0    | C/P                  |
| 28         | 80  | Male   | SCC            | T1bN2M0   | C/P                  |
| 29         | 53  | Female | SCC            | T1N3M0    | C/E                  |
| 30         | 61  | Male   | SCC            | T1N0M0    | C/P                  |
| 31         | 63  | Male   | AdenoCA        | T2N3M0    | C/E                  |
| 32         | 54  | Female | AdenoCA        | T3N3M0    | C/P                  |
| 33         | 59  | Male   | AdenoCA        | T2N2M0    | C/P                  |
| 34         | 64  | Female | SCC            | T2N3M0    | C/E                  |
| 35         | 83  | Male   | NS             | T2N0M0    | C/P                  |
| 36         | 63  | Female | SCC            | T2N2M0    | C/P                  |
| 38         | 56  | Female | AdenoCA        | T2bN3M0   | C/E                  |
| 39         | 86  | Male   | AdenoCA        | T2bN2M0   | C/P                  |
| 40         | 55  | Female | AdenoCA        | T1N1M0    | C/E                  |
| 41         | 82  | Male   | SCC            | T2N3M0    | C/P                  |
| 42         | 67  | Male   | Neuroendocrine | T1bN2M0   | C/E                  |
| 43         | 57  | Male   | AdenoCA        | T1N2M0    | C/E                  |
| 44         | 80  | Male   | SCC            | TxN3M0    | C/P                  |
| 45         | 66  | Male   | AdenoCA        | T3/4N2M0  | C/E                  |
| 46         | 67  | Female | NS             | T2N0M0    | C/P                  |
| 47         | 62  | Male   | SCC            | T2N2M0    | C/P                  |
| 48         | 72  | Male   | Neuroendocrine | T3N1M0    | C/P                  |
| 50         | 68  | Female | AdenoCA        | T1bN2M0   | C/P                  |
| 51         | 70  | Male   | AdenoCA        | T3N2M0    | C/P                  |
| 52         | 78  | Male   | AdenoCA        | T4N2M0    | C/E                  |
| 53         | 68  | Male   | AdenoCA        | T2aN3M0   | C/E                  |
| 54         | 77  | Male   | AdenoCA        | T2bN2M0   | C/P                  |
| 55         | 31  | Female | AdenoCA        | T1aN3M1a  | C/E                  |
| 56         | 69  | Male   | AdenoCA        | T1bN3M0   | C/E                  |
| 57         | 74  | Male   | AdenoCA        | T3N0M0    | C/P                  |
| 58         | 68  | Male   | AdenoCA        | T1bN2M0   | C/E                  |
| 59         | 84  | Male   | AdenoCA        | T1bN1M0   | C/P                  |
| 60         | 64  | Male   | AdenoCA        | T2aN3M0   | C/E                  |
| 61         | 80  | Male   | SCC            | T4N0M0    | C/P                  |
| 62         | 65  | Male   | SCC            | T2N2M0    | C/P                  |
| 63         | 64  | Male   | SCC            | T1N3M0    | C/E                  |
| 65         | 68  | Female | SCC            | T2bN1M0   | C/E                  |
| 67         | 54  | Male   | NS             | T2N2M0    | C/E                  |

Blood counts performed for standard clinical management.

Acute toxicity of C/E regimen (A) compared to C/P (B). Green curves represent the patient with FLT PET/CT SUVmax values closest to median bone marrow values for the C/E and C/P cohorts, as highlighted in Figure 1A-B, respectively 1C-D.

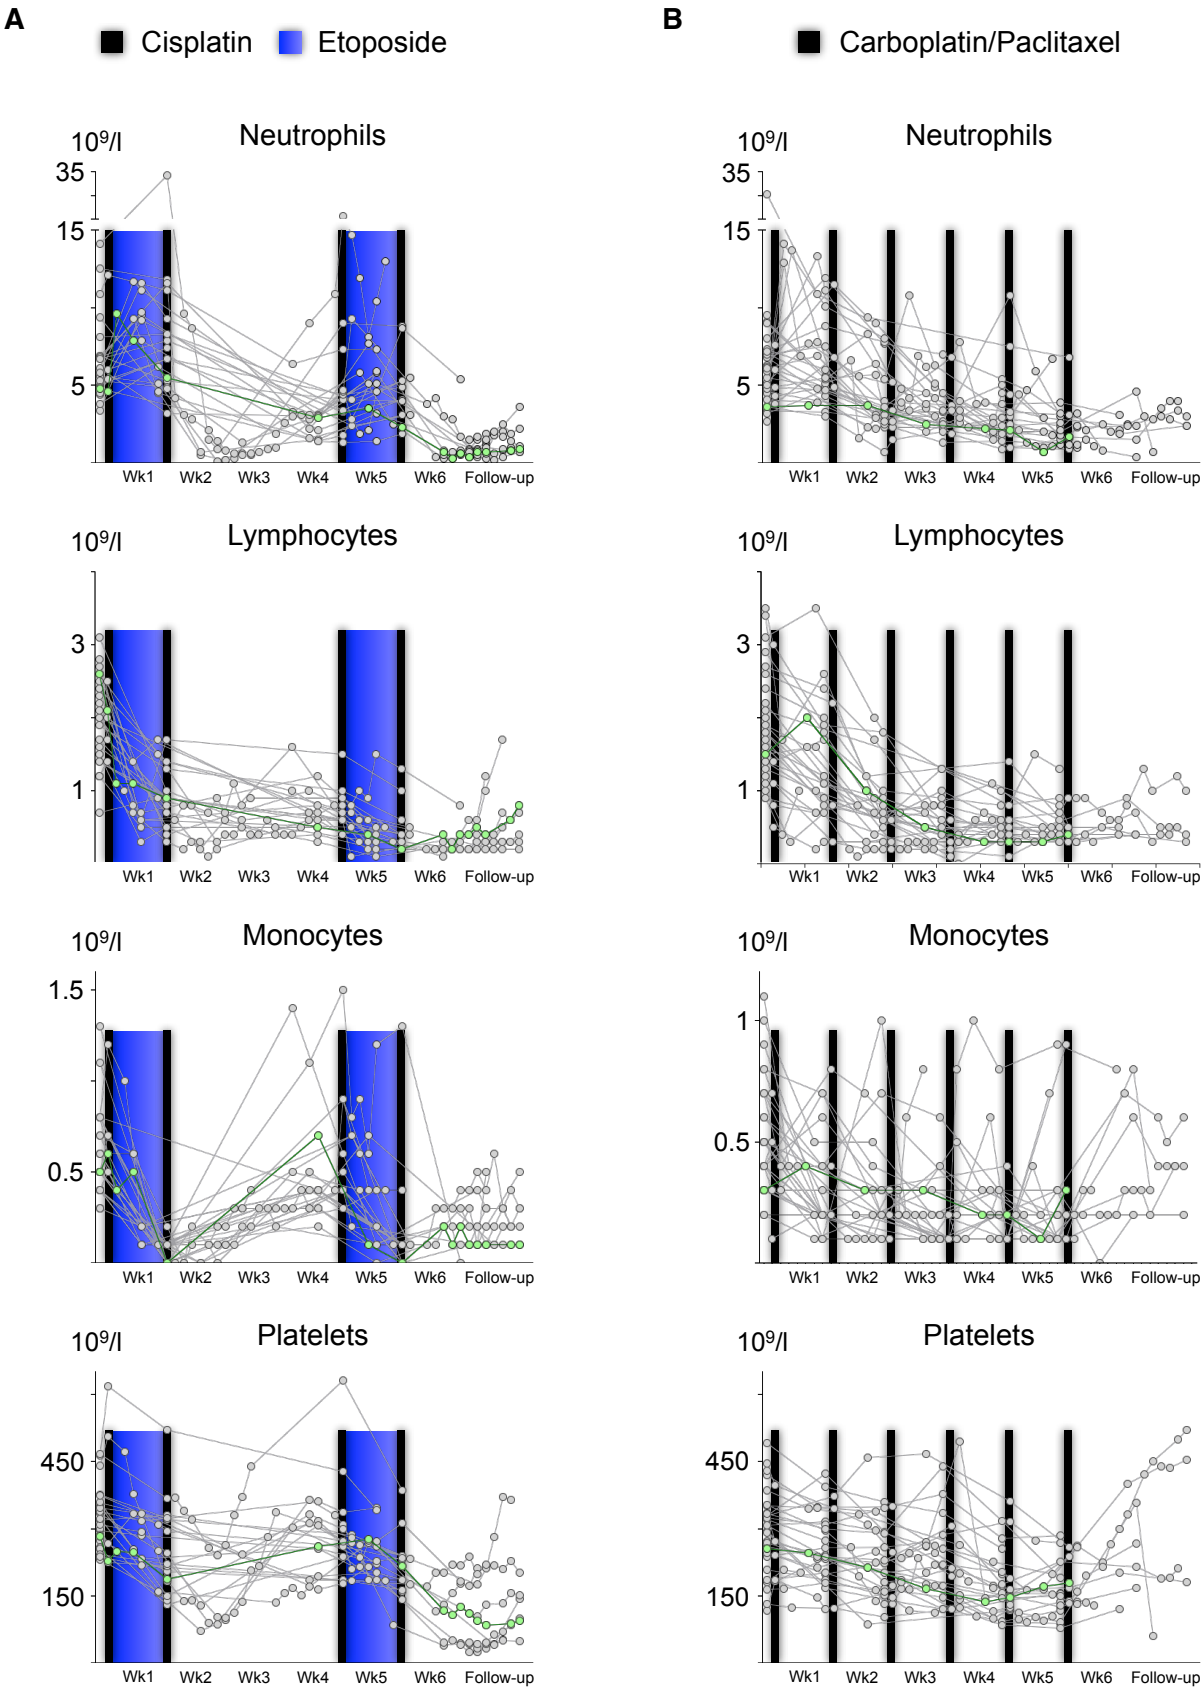

Blood smears illustrating increase of neutrophil counts at Week 2 in support to Figure 3

Prospective blood collection at the time of each FLT PET/CT demonstrate in both chemotherapy regimen that neutrophils did slightly increase at Week 2. Representative C/E and C/P patient 10x magnification pictures of blood smears at the 3 time points (white blood cells have deep blue-purple nuclei) (A). Cell counts per field in these two patients (B). Black lines: median SUVmax values; NS: non significant

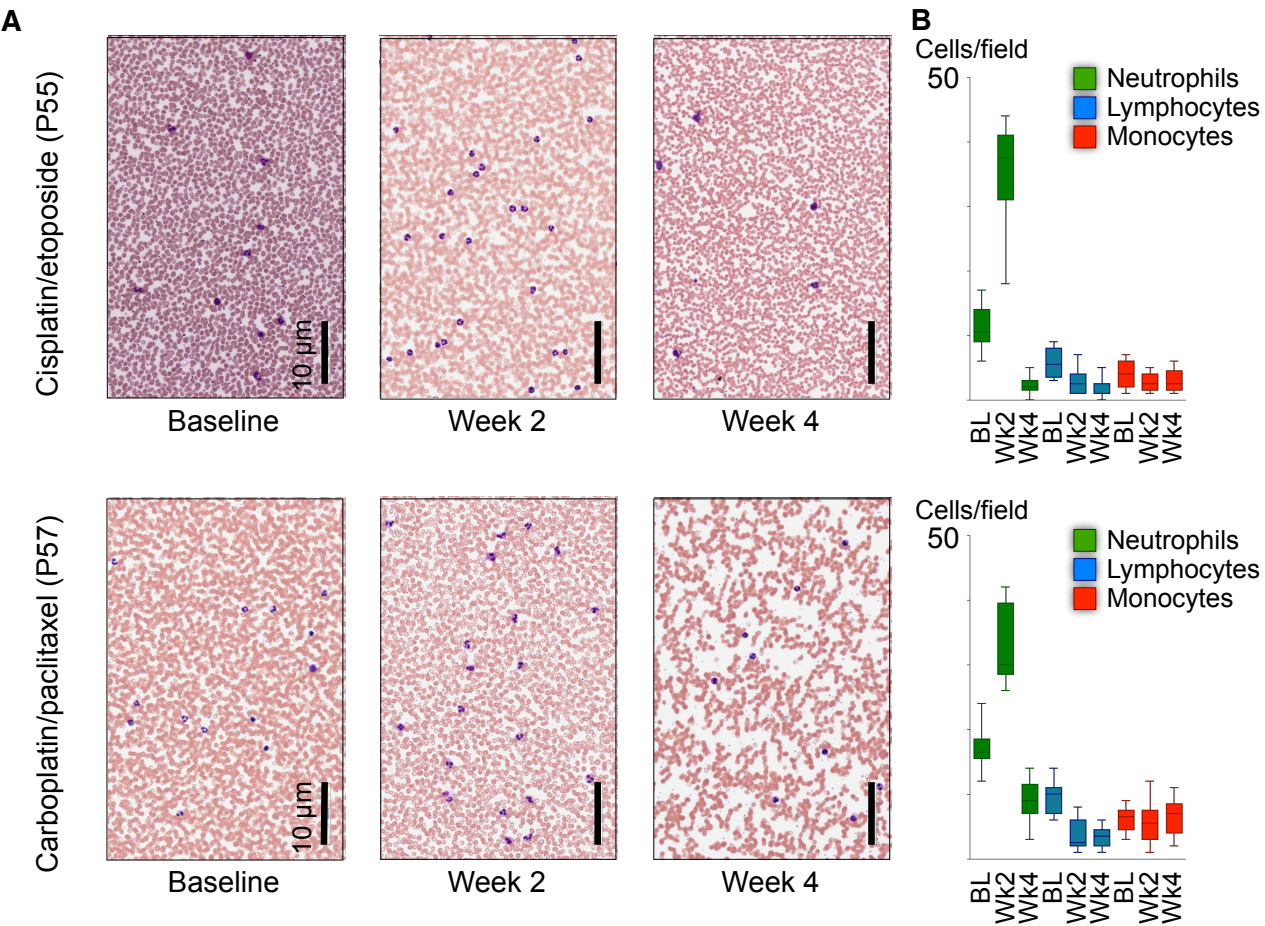

### Supplemental Figure 3

### Analysis of baseline, Week 2 and Week 4 FDG SUVmax uptake in the bone marrow, spleen and liver

Representative C/E patient P14 (A). Compared to FLT (Figures 1 & 2), less intense uptake in the bone marrow and less uptake variation in all organs than FLT are demonstrated (B).

Black lines: median FDG SUV<sub>max</sub> values; Blue lines: median FLT SUV<sub>max</sub> values from Figure 1 and 2; ns: non significant; \*: p<0.05; \*\*: p<0.01; \*\*\*: p<0.001.

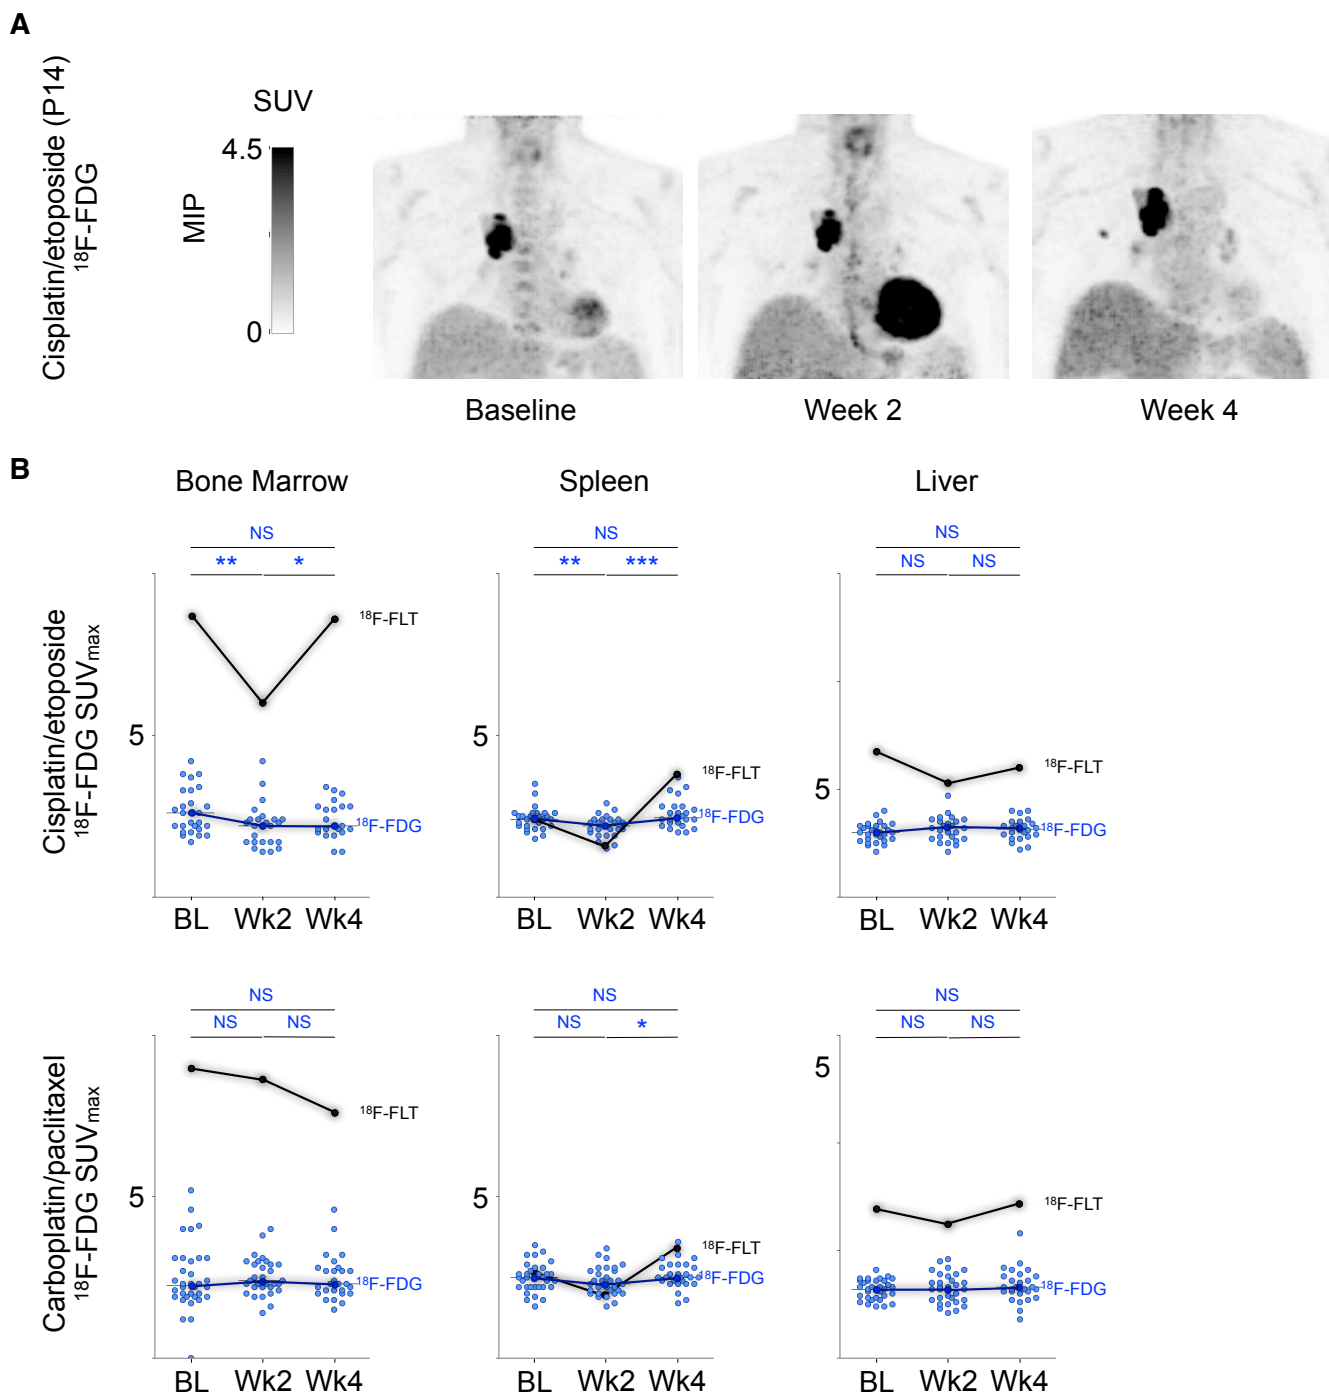

Supplement: 136127_Supplemental_Data.pdf [file 136127_Supplemental_Data.pdf]
